# Supplementary material for: Mechanistic studies on the N-alkylation of amines with alcohols catalysed by iridium(i) complexes with functionalised N-heterocyclic carbene ligands
Source: Royal Society of Chemistry journal article supplement (doi:10.1039/c7cy02488f), 2018-01-01
Supplement: c7cy02488f2.pdf [file c7cy02488f2.pdf]

## Supporting Information

### “Mechanistic Studies on the N-Alkylation of Amines with Alcohols Catalysed by Iridium(I) Complexes with Functionalized N-Heterocyclic Carbene Ligands”

*M. Victoria Jiménez, \* Javier Fernández-Tornos, Miguel González-Lainez, Beatriz Sánchez-Page,  
Francisco J. Modrego, Luis A. Oro and Jesús J. Pérez-Torrente\**

Departamento de Química Inorgánica, Instituto de Síntesis Química y Catálisis Homogénea-  
ISQCH, Universidad de Zaragoza-CSIC, 50009-Zaragoza, Spain.

|                                                                                                                                            |     |
|--------------------------------------------------------------------------------------------------------------------------------------------|-----|
| 1.- Experimental procedure for the isolation of N-alkylated amine products .....                                                           | S1  |
| 2.- NMR spectra for <i>N</i> -benzylaniline: Figures S1, S2 and S3 .....                                                                   | S5  |
| 3.- NMR spectra for <i>N</i> -hexylaniline: Figures S4, S5 and S6 .....                                                                    | S7  |
| 4.- NMR spectra for <i>N</i> -phenethylaniline: Figures S7, S8 and S9 .....                                                                | S9  |
| 5.- NMR spectra for <i>N</i> -benzyl-4-methyl-aniline: Figures S10 and S11 .....                                                           | S11 |
| 6.- NMR spectra for <i>N</i> -phenethyl-4-methyl-aniline: Figures S12, S13 and S14 .....                                                   | S12 |
| 7.- NMR spectra for dibenzylamine: Figures S15 and S16 .....                                                                               | S14 |
| 8.- NMR spectra for <i>N</i> -benzyl-2-phenylethan-1-amine: Figures S17 and S18.....                                                       | S15 |
| 9.- DFT calculated mechanism for the N-alkylation of amines with alcohols catalyzed by<br>iridium(I) complexes: Figure S19. ....           | S16 |
| 10.- Alternative mechanisms for the imine formation catalyzed by NHC-Ir(I) complexes: Figure<br>S20.....                                   | S16 |
| 11.- Energy profiles for the different pathways for the C-N bond formation step: Fig. S21.                                                 | S17 |
| 12.- Calculated electronic and free energies: Table S1 .....                                                                               | S18 |
| 13.- Structures for <b>TS</b> <sub>9-10</sub> , <b>TS</b> <sub>12-13</sub> and <b>TS</b> <sub>16-17</sub> : Figures S22, S23 and S24 ..... | S19 |

## Experimental procedure for the isolation of N-alkylated amine products.

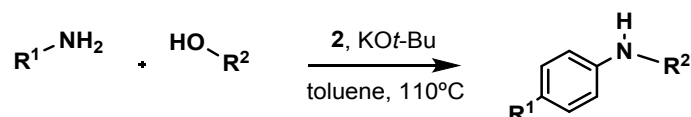

The catalytic N-alkylation reactions were carried out under an argon atmosphere in thick glass reaction tubes fitted with a greaseless high-vacuum stopcock. In a typical experiment, the reactor was charged with a solution of the amine (3.0 mmol) and the alcohol (3.0 mmol) in toluene (0.3 mL), internal standard (mesitylene, 70  $\mu\text{L}$ , 0.5 mmol), base (KOt-Bu, 1.5 mmol) and the catalyst (0.03 mmol, 1 mol%). The resulting mixture was stirred at room temperature until complete solution of the catalyst and then placed in a thermostated oil bath at 110  $^\circ\text{C}$  until completeness of the reaction. The reaction mixture was cooled to room temperature and all volatiles were removed under vacuum. Then water (5 mL) was added to the residue and extracted with diethyl ether (3x10 mL). The combined organic layers were dried over  $\text{MgSO}_4$ , filtered and the solvent removed under vacuum. The residue was dissolved with 3 mL hexane and then eluted through a silica gel column using hexane/diethyl ether (typically 5:1) as eluent.

**N-benzylaniline**,  $\text{R}^1 = \text{Ph}$ ,  $\text{R}^2 = \text{CH}_2\text{Ph}$  (Table 3, entry 1). Purification by column chromatography (hexano:diethyl ether, 5:1), 505 mg, 92%.  $^1\text{H}$  NMR (300 MHz,  $\text{CDCl}_3$ , ppm):  $\delta$ : 7.44-7.32 (m, 5H), 7.22 (t,  $J = 8.0$  Hz, 2H), 6.76 (t,  $J = 7.3$  Hz, 1H), 6.68 (d,  $J = 8.0$  Hz, 2H), 4.38 (s, 2H), 4.06 (s\_br, 1H).  $^{13}\text{C}\{^1\text{H}\}$  NMR (300 MHz,  $\text{CDCl}_3$ , ppm):  $\delta$ : 148.2, 139.5 (C), 129.3, 128.6, 127.5, 127.2, 117.6, 112.9 (CH), 48.4 ( $\text{CH}_2$ ). The NMR data are consistent with those previously reported [T. Kawakami, T. Sugimoto, I. Shibata, A. Baba, H. Matsuda and N. Sonoda, *J. Org.Chem.*, **1995**, 60, 2677-2682; H. Kato, I. Shibata, Y. Yasaka, S. Tsunoi, M. Yasudaa and A. Baba *Chem. Commun.*, **2006**, 4160-4168; B. Blank, M. Madalska, B. Blank, M. Madalska, R. Kempe, *Adv. Synth. Catal.* **2008**, 350, 749–758].

**N-hexylaniline**  $\text{R}^1 = \text{Ph}$ ,  $\text{R}^2 = (\text{CH}_2)_6$  (Table 3, entry 9): Purification by column chromatography (hexano:diethyl ether, 5:1), 516 mg, 97%.  $^1\text{H}$  NMR (300 MHz,  $\text{CDCl}_3$ , ppm):  $\delta$ : 7.21 (t,  $J = 7.5$  Hz, 2H), 6.72 (t,  $J = 7.2$  Hz, 1H), 6.64 (d,  $J = 8.3$  Hz, 2H), 3.62 (s\_br, 1H), 3.14, 1.65, 1.41, 1.37 (m, 10H), 0.94 (t,  $J = 6.6$  Hz, 3H).  $^{13}\text{C}\{^1\text{H}\}$  NMR (300 MHz,  $\text{CDCl}_3$ , ppm):  $\delta$ : 148.6, (C), 129.2, 117.1, 112.7 (CH), 44.0, 31.7, 29.6, 26.9, 22.6 ( $\text{CH}_2$ ), 14.0 ( $\text{CH}_3$ ). The NMR data are consistent with those previously reported [M. Yus, J. Barluenga *J. Org. Chem.* **1982**, 47,

156 0–1564; E. Byun, B. Hong, K. A. De Castro, M. Lim, H. Rhee *J. Org. Chem.* **2007**, *72*, 9815–9817].

***N*-phenethylaniline** R<sup>1</sup> = Ph, R<sup>2</sup> = (CH<sub>2</sub>)<sub>2</sub>Ph (Table 3, entry 10): Purification by column chromatography (hexano:diethyl ether, 5:1), 497 mg, 84%. <sup>1</sup>H NMR (300 MHz, CDCl<sub>3</sub>, ppm): δ: 7.40–7.21 (m, 7H), 6.76 (t, *J* = 6.7 Hz, 1H), 6.67 (d, *J* = 8.1 Hz, 2H), 3.70 (s<sub>br</sub>, 1H) 3.46, (t, *J* = 8.1 Hz, 2H), 2.96 (t, *J* = 8.1 Hz, 2H). <sup>13</sup>C{<sup>1</sup>H} NMR (300 MHz, CDCl<sub>3</sub>, ppm): δ: 148.0, 139.3 (C), 129.3, 128.8, 128.6, 126.4, 117.5, 113.0 (CH), 45.1, 35.6 (CH<sub>2</sub>). The NMR data are consistent with those previously reported [M. Beller, O. R. Thiel, H. Trauthwein, C. G. Hartung, *Chem. Eur. J.* **2000**, *6*, 2513–2522; A. S. Gajare, K. Toyota, M. Yoshifuji, F. Ozawa *J. Org. Chem.*, **2004**, *69*, 6504–6506; K. Fujita, Y. Enoki, R. Yamaguchi, *Tetrahedron* **2008**, *64*, 1943–1954].

***N*-benzyl-4-methyl-aniline** R<sup>1</sup> = *p*-CH<sub>3</sub>-C<sub>6</sub>H<sub>4</sub>, R<sup>2</sup> = CH<sub>2</sub>Ph (Table 4, entry 2): Purification by column chromatography (hexano:diethyl ether, 5:1), 491 mg, 83%. <sup>1</sup>H NMR (300 MHz, CDCl<sub>3</sub>, ppm): δ: 7.44–7.32 (m, 5H), 7.05 (d, *J* = 8.3 Hz, 2H), 6.69 (d, *J* = 8.3 Hz, 2H), 4.36 (s, 2H), 4.04 (s<sub>br</sub>, 1H), 2.30 (s, 3H). <sup>13</sup>C{<sup>1</sup>H} NMR (300 MHz, CDCl<sub>3</sub>, ppm): δ: 145.8, 139.6 (C), 129.8, 128.6, 127.6, 127.2 (CH), 126.9 (C), 113.2 (CH), 48.8 (CH<sub>2</sub>), 20.4 (CH<sub>3</sub>). The NMR data are consistent with those previously reported [D. B. Bagal, R. A. Watile, M. V. Khedkar, K. P. Dhake, B. M. Bhanage, *Catal. Sci. Technol.*, **2012**, *2*, 354–358].

***N*-phenethyl-4-methyl-aniline** R<sup>1</sup> = *p*-CH<sub>3</sub>-C<sub>6</sub>H<sub>4</sub>, R<sup>2</sup> = (CH<sub>2</sub>)<sub>2</sub>Ph (Table 4, entry 7): Purification by column chromatography (hexano:diethyl ether, 5:1), 526 mg, 83%. <sup>1</sup>H NMR (300 MHz, CDCl<sub>3</sub>, ppm): δ: 7.38–7.25 (m, 5H), 7.04 (d, *J* = 7.7 Hz, 2H), 6.59 (d, *J* = 7.7 Hz, 2H), 3.43 (d, *J* = 7.2 Hz, 4H), 2.95 (d, *J* = 7.2 Hz, 2H), 2.29 (s, 3H). <sup>13</sup>C{<sup>1</sup>H} NMR (300 MHz, CDCl<sub>3</sub>, ppm): δ: 145.8, 139.4 (C), 129.8, 128.8, 128.6 (CH), 126.7 (C), 126.4, 113.3 (CH), 45.5, 35.6 (CH<sub>2</sub>), 20.4 (CH<sub>3</sub>). The NMR data are consistent with those previously reported [X. Cui, Y. Zhang, F. Shi, Y. Deng, *Chem. Eur. J.* **2011**, *17*, 2587–2591; D. Jaspers, S. Doye, *Synlett* **2011**, 1444–1448].

**Dibenzylamine** R<sup>1</sup> = CH<sub>2</sub>Ph, R<sup>2</sup> = CH<sub>2</sub>Ph (Table 4, entry 12): Purification by column chromatography (hexano:diethyl ether, 1:1), 495 mg, 81%. <sup>1</sup>H NMR (300 MHz, CDCl<sub>3</sub>, ppm): δ:

7.42-7.28 (m, 10H), 3.85 (s, 4H), 2.27 (s\_br, 1H).  $^{13}\text{C}\{^1\text{H}\}$  NMR (300 MHz,  $\text{CDCl}_3$ , ppm):  $\delta$ : 139.9, 128.6, 128.5, 127.5 (CH), 52.2 ( $\text{CH}_2$ ), 20.4 ( $\text{CH}_3$ ). The NMR data are consistent with those previously reported [O. Y. Lee, K. -L. Law, D. Yang, *Org. Lett.*, **2009**, *11*, 3302–3305].

***N*-benzyl-*N*-phenethylamine**  $\text{R}^1 = \text{CH}_2\text{Ph}$ ,  $\text{R}^2 = \text{CH}_2\text{CH}_2\text{Ph}$  (Table 4, entry 14): Purification by column chromatography (diethyl ether), 576 mg, 91%.  $^1\text{H}$  NMR (300 MHz,  $\text{CDCl}_3$ , ppm):  $\delta$ : 7.35-7.22 (m, 10H), 3.85 (s, 2H), 2.91 (m, 4H), 1.94 (s\_br, 1H).  $^{13}\text{C}\{^1\text{H}\}$  NMR (300 MHz,  $\text{CDCl}_3$ , ppm):  $\delta$ : 139.9, 139.8, 129.4, 129.0, 128.7, 128.6, 128.4, 128.3, 128.1, 127.5, 126.9, 126.1 (CH), 53.7, 50.4, 36.2 ( $\text{CH}_2$ ). The NMR data are consistent with those previously reported [S. Kuhl, R. Schneider, Y. Fort, *Organometallics* **2003**, *22*, 4184–4186; K. Fujita, Y. Enoki, R. Yamaguchi, *Tetrahedron* **2008**, *64*, 1943–1954; R. Kawahara, K. Fujita, R. Yamaguchi, *Adv. Synth. & Catal.*, **2011**, *353*, 1161–1168].

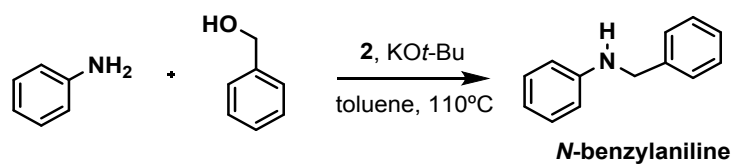

P4-VJ  
P4, CDCl<sub>3</sub>, fracdon1-BzOH+NH<sub>2</sub>

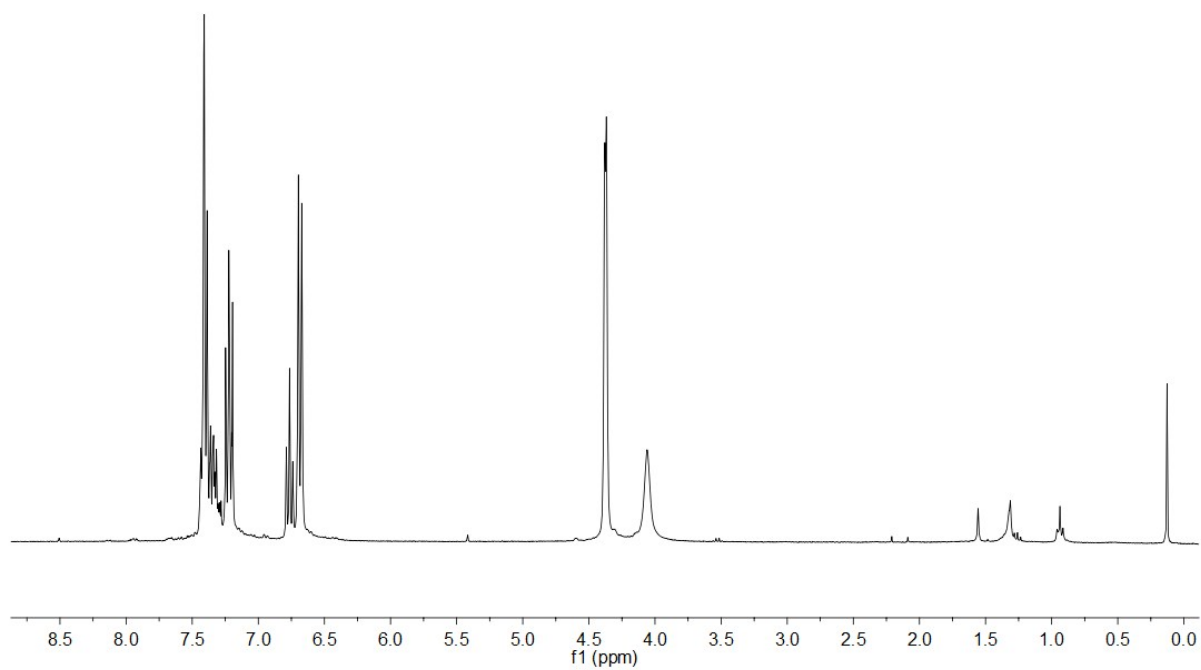

**Figure S1.** <sup>1</sup>H (CDCl<sub>3</sub>, 298 K) NMR spectrum of *N*-benzylaniline.

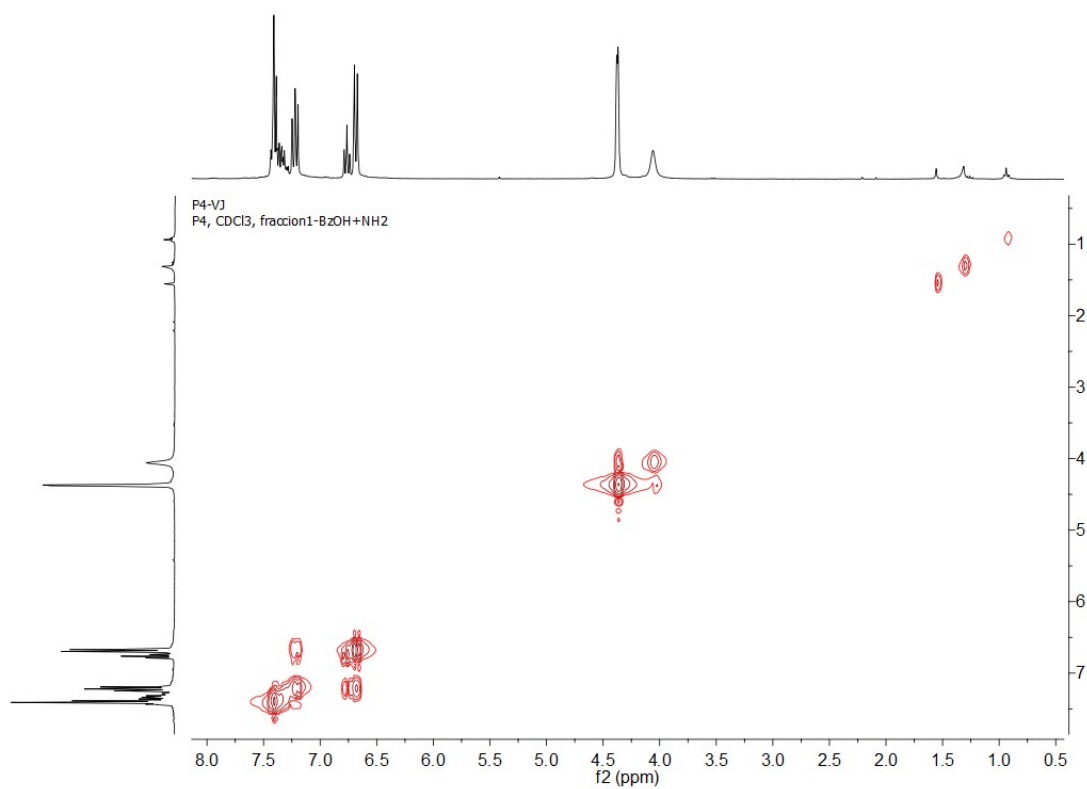

**Figure S2.**  $^1\text{H}$ - $^1\text{H}$ -cosy ( $\text{CDCl}_3$ , 298 K) NMR spectrum of *N*-benzylaniline.

P4-VJ

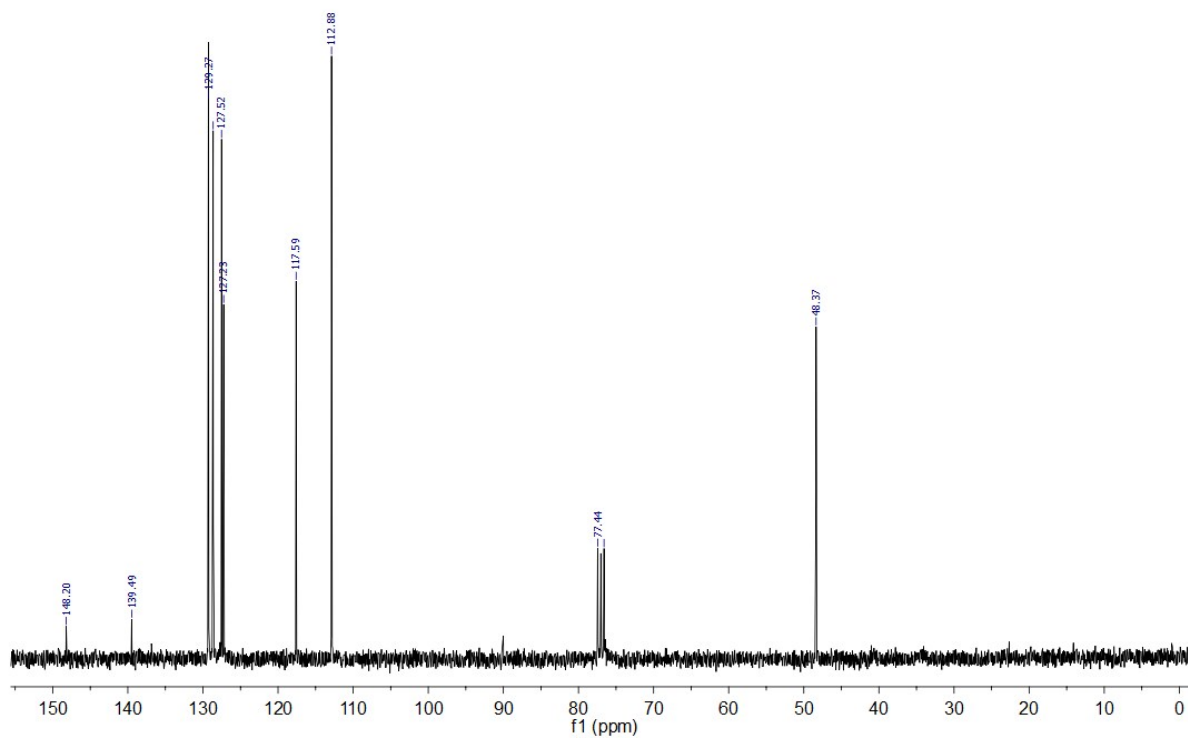

**Figure S3.**  $^{13}\text{C}\{^1\text{H}\}$  ( $\text{CDCl}_3$ , 298 K) NMR spectrum of *N*-benzylaniline.

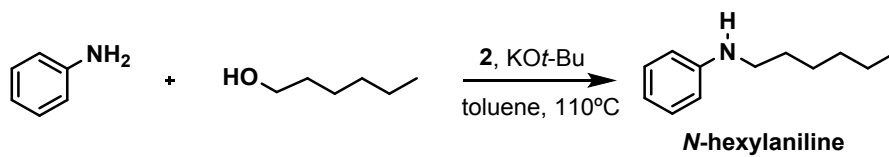

P7-VJ  
 P7, JF7 cat, Hex-OH+ NH2, fraccion-2, cdcl3

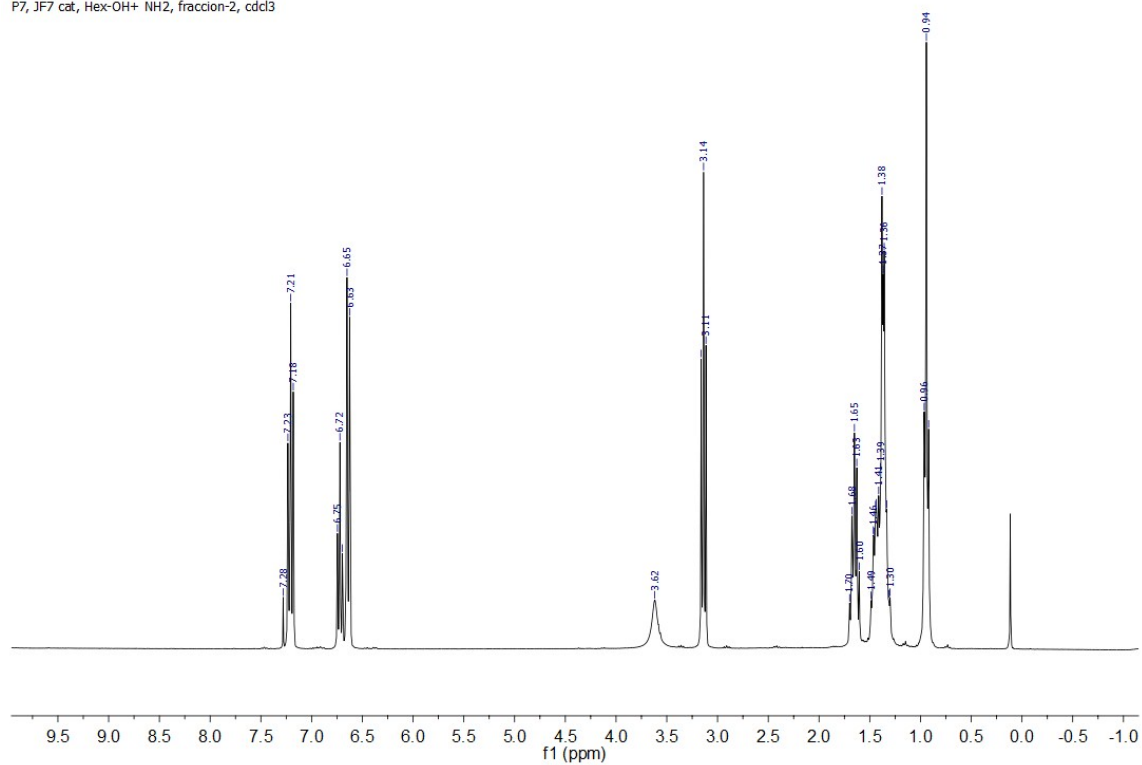

**Figure S4.**  $^1\text{H}$  ( $\text{CDCl}_3$ , 298 K) NMR spectrum of *N*-hexylaniline.

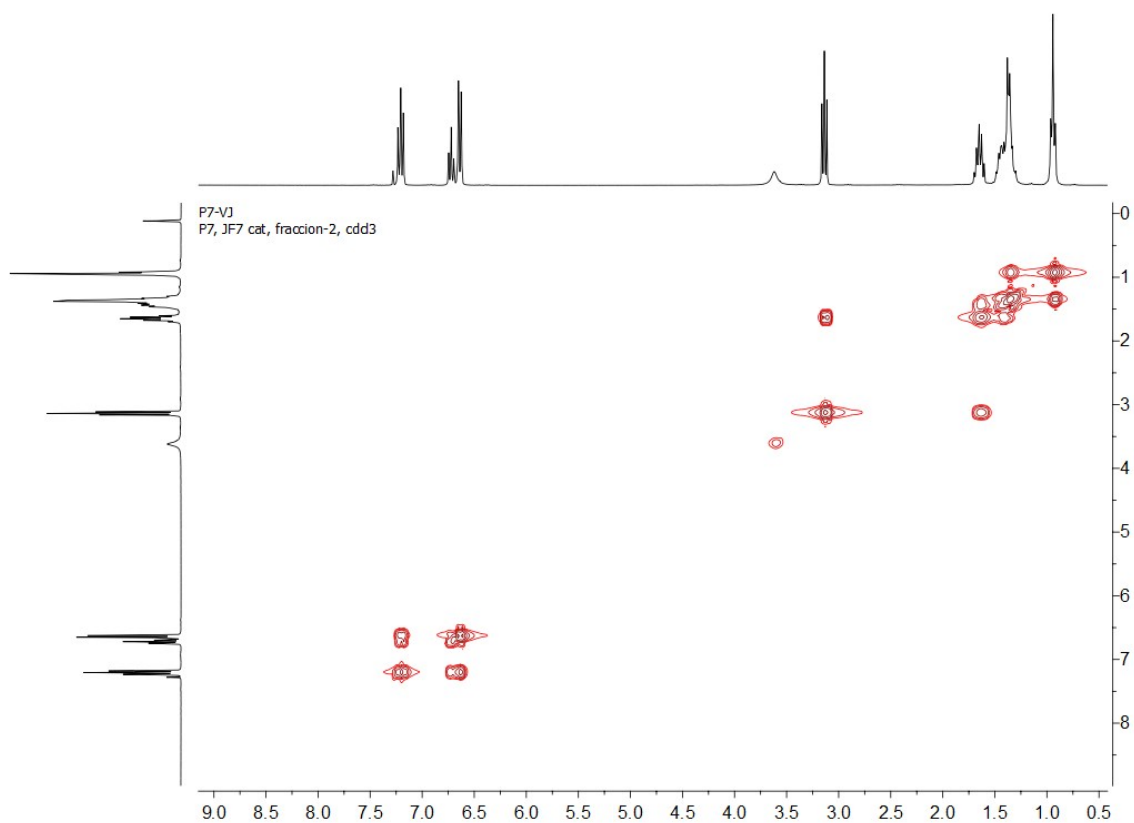

**Figure S5.**  $^1\text{H}$ - $^1\text{H}$ -cosy ( $\text{CDCl}_3$ , 298 K) NMR spectrum of *N*-hexylaniline.

P7-VJ  
P7, JF7 cat, fraction-2 after weekend, cdd3

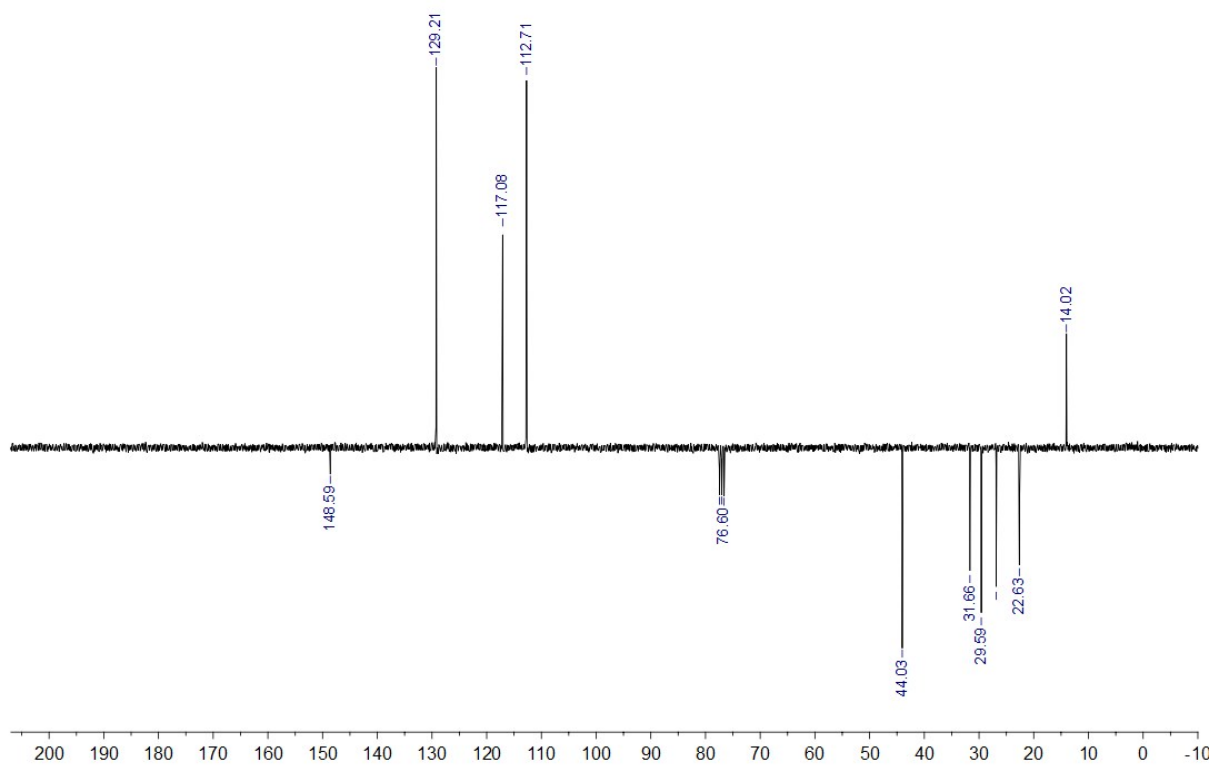

**Figure S6.**  $^{13}\text{C}\{^1\text{H}\}$ -apt ( $\text{CDCl}_3$ , 298 K) NMR spectrum of *N*-hexylaniline.



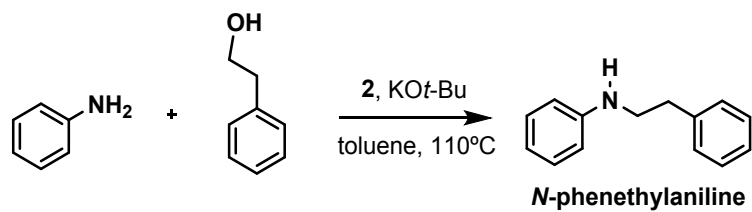

P6-VJ  
P6, CDCl<sub>3</sub>, fraccion1-PhEtOH+NH<sub>2</sub>, 1H

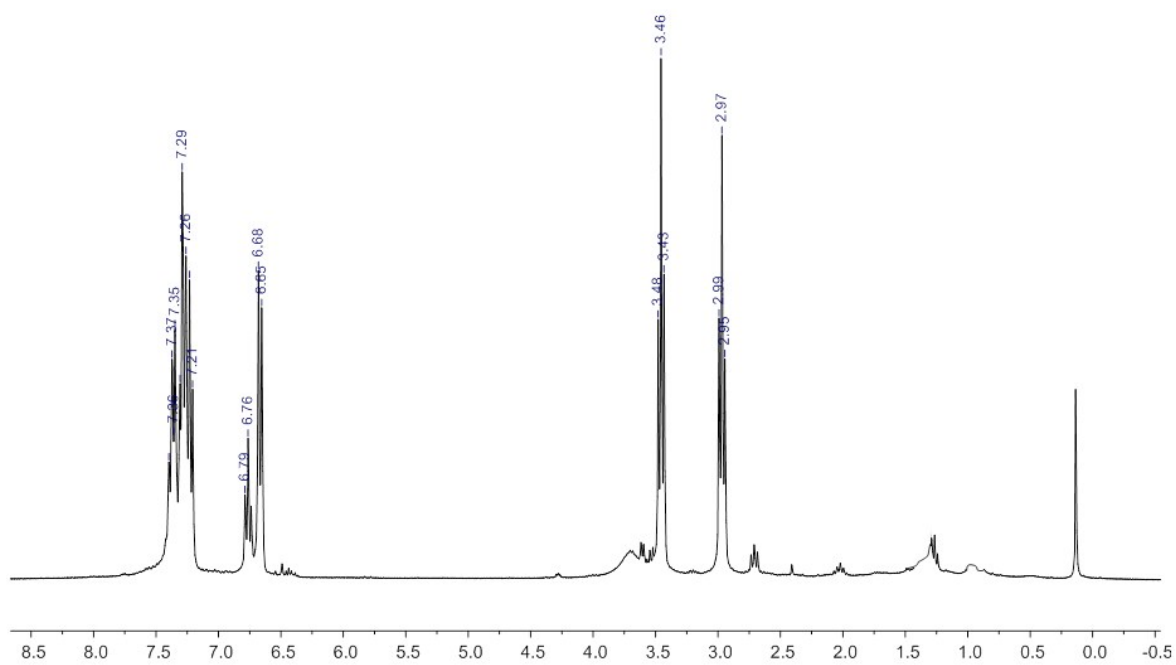

**Figure S7.** <sup>1</sup>H (CDCl<sub>3</sub>, 298 K) NMR spectrum of *N*-phenethylaniline.

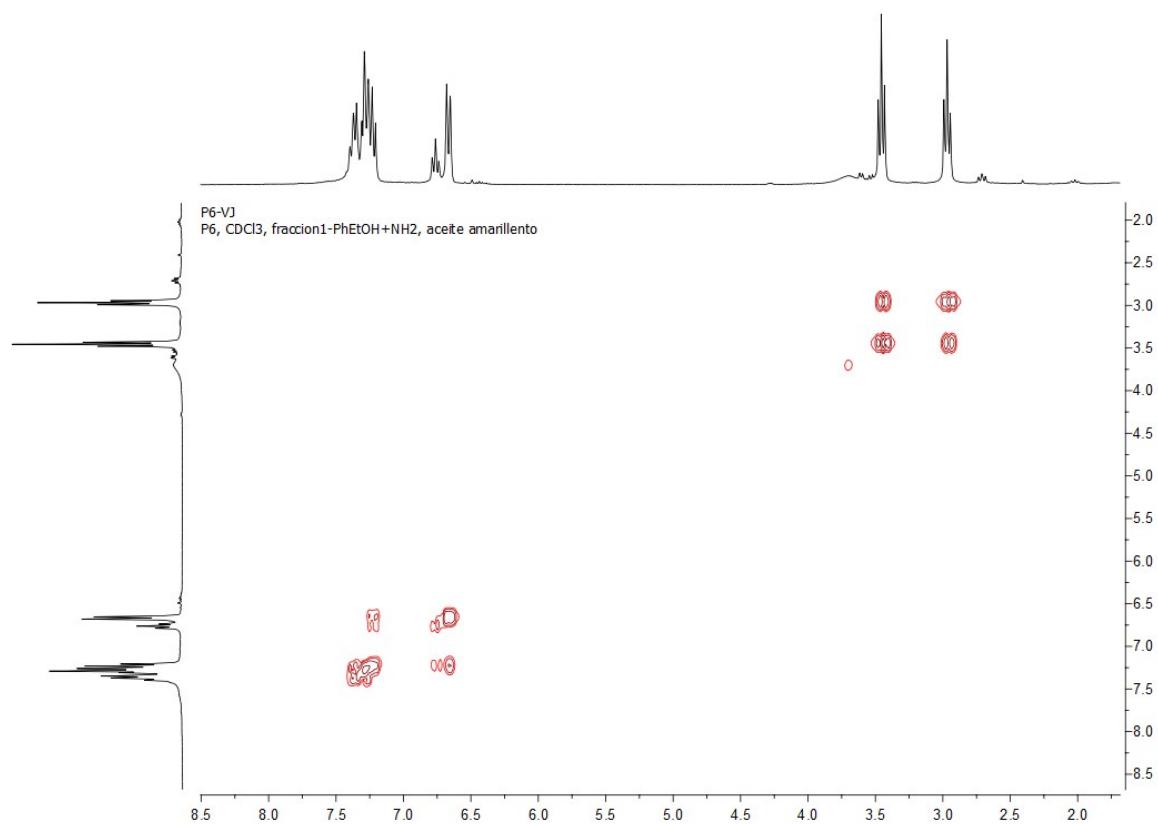

**Figure S8.**  $^1\text{H}$ - $^1\text{H}$ -cosy (CDCl<sub>3</sub>, 298 K) NMR spectrum of *N*-phenethylamine.

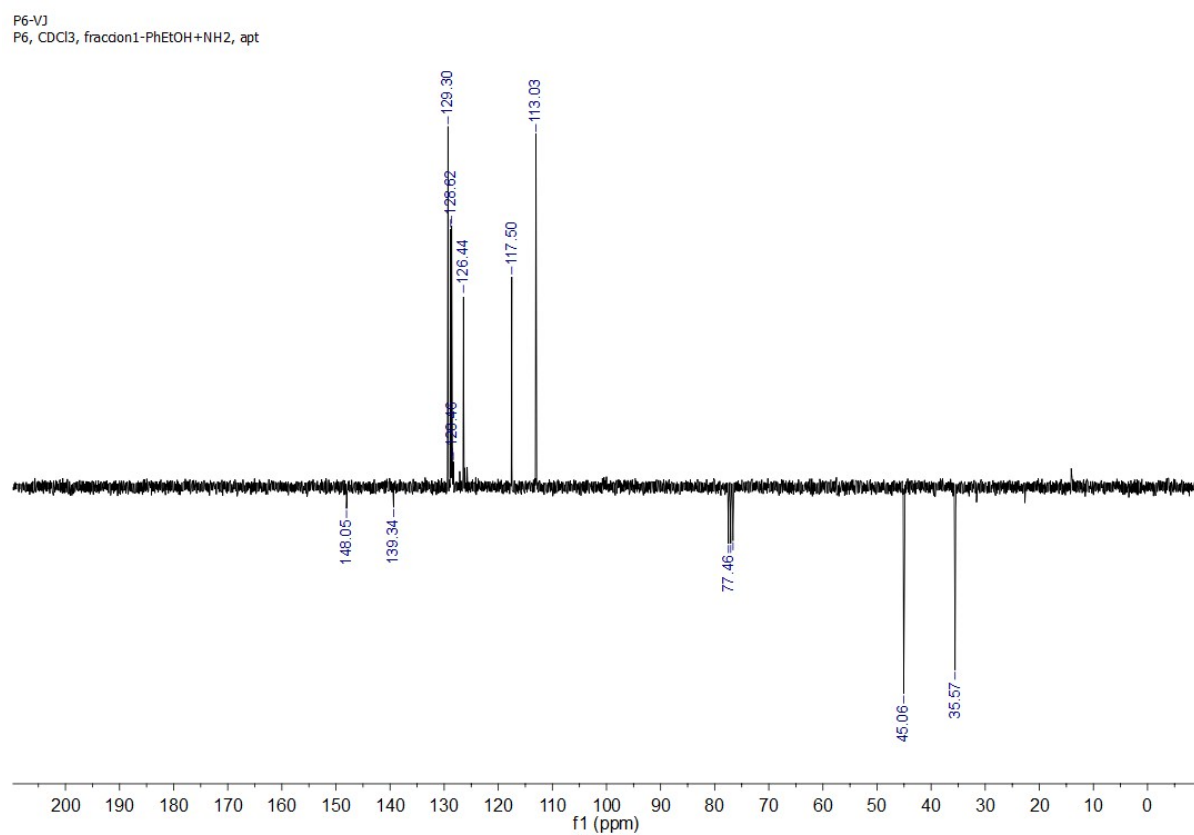

**Figure S9.**  $^{13}\text{C}\{^1\text{H}\}$ -apt (CDCl<sub>3</sub>, 298 K) NMR spectrum of *N*-phenethylamine.

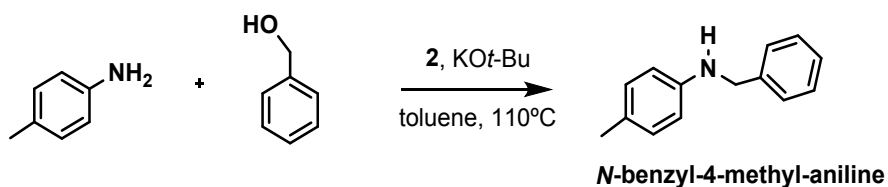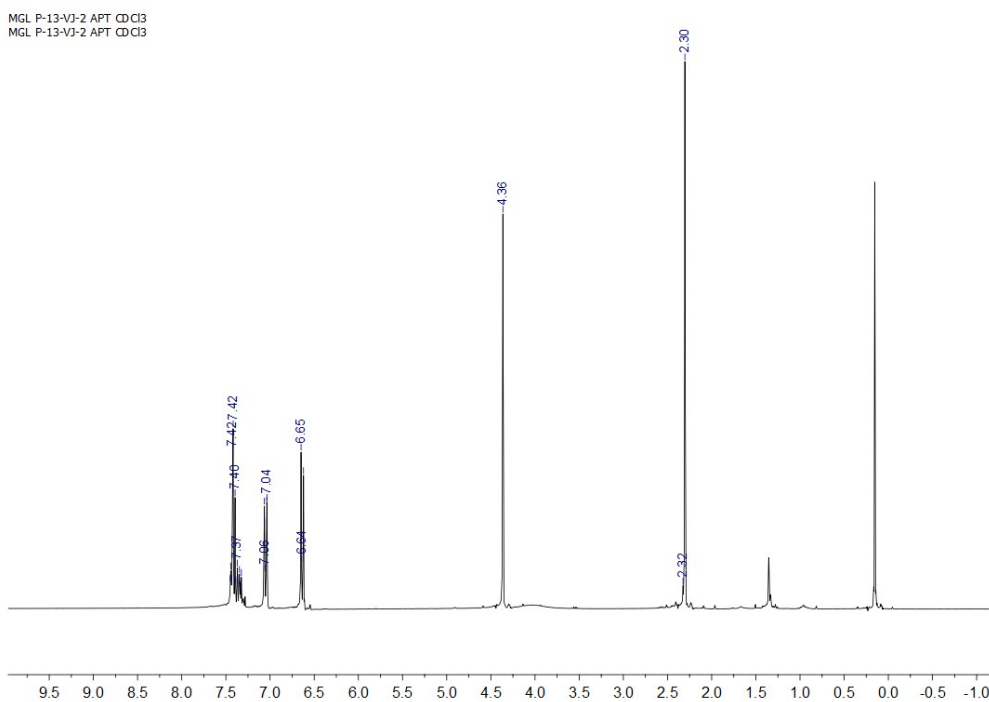

**Figure S10.** <sup>1</sup>H (CDCl<sub>3</sub>, 298 K) NMR spectrum of *N*-benzyl-4-methyl-aniline.

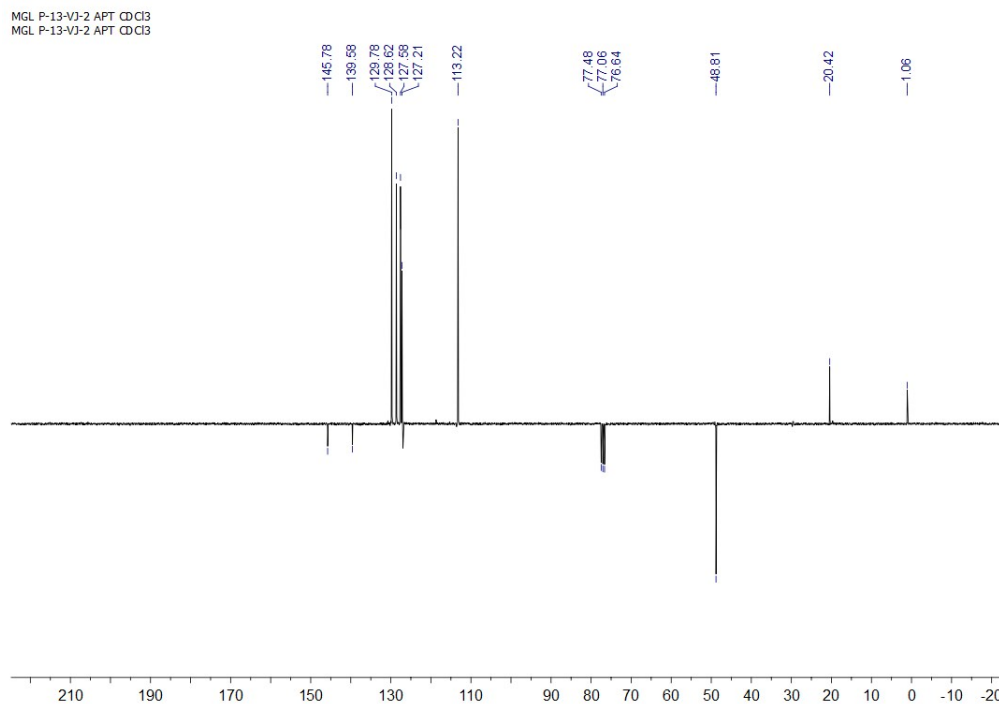

**Figure S11.** <sup>13</sup>C {<sup>1</sup>H}-apt (CDCl<sub>3</sub>, 298 K) NMR spectrum of *N*-benzyl-4-methyl-aniline.

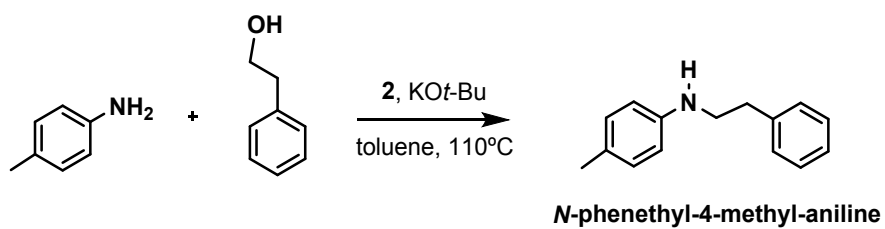

P5nuev o-VJ  
 P5, JF7 cat, 2PhEtOH+ CH3NH2, fraccion-2, ccd3

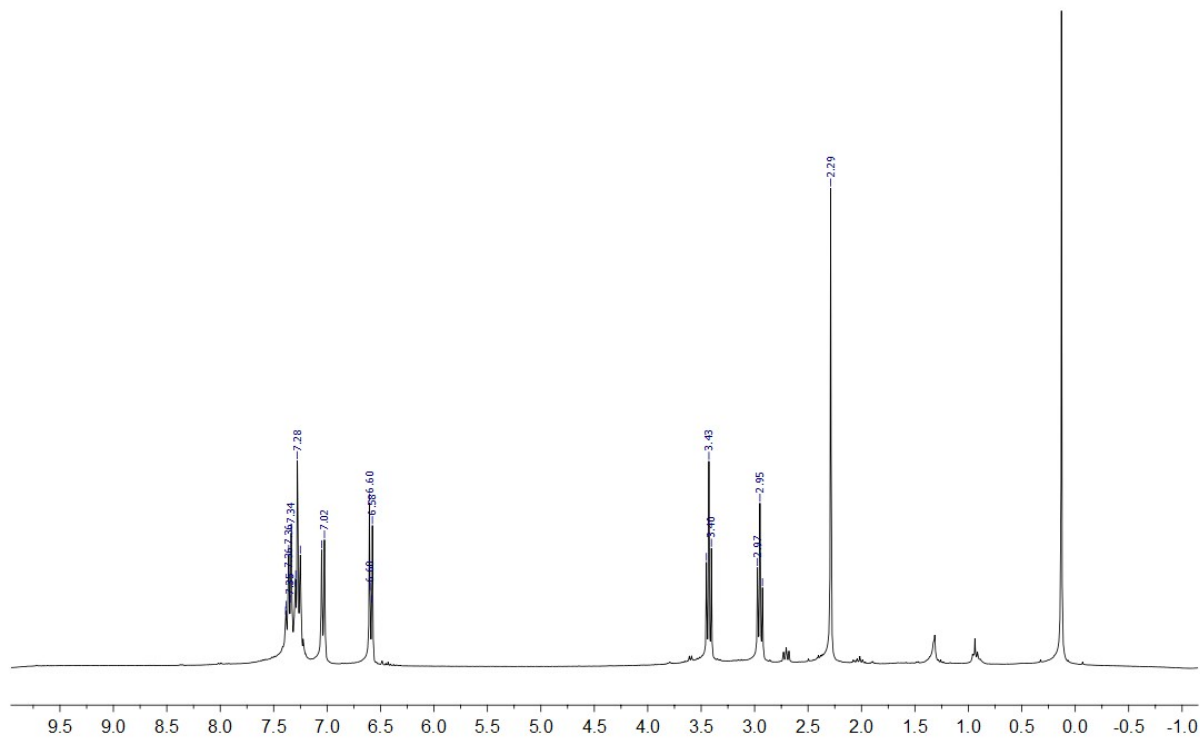

**Figure S12.** <sup>1</sup>H (CDCl<sub>3</sub>, 298 K) NMR spectrum of *N*-phenethyl-4-methyl-aniline.

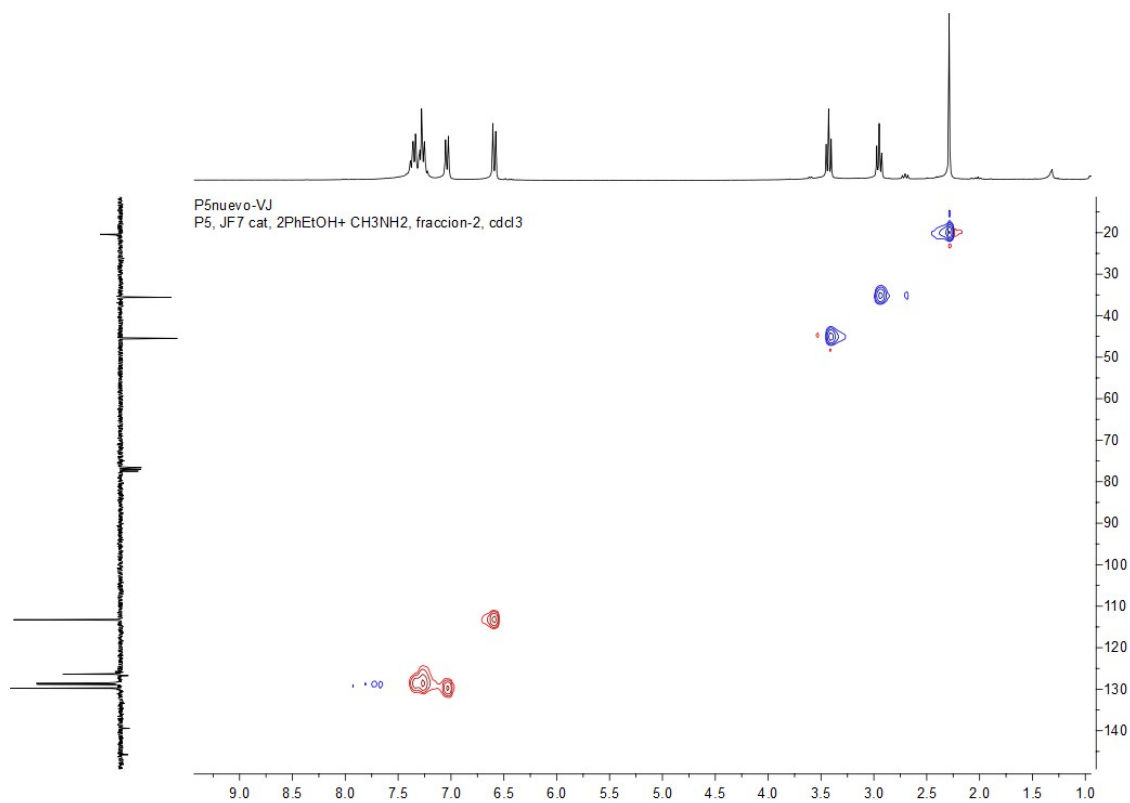

**Figure S13.**  $^1\text{H}$ - $^{13}\text{C}$ -apt ( $\text{CDCl}_3$ , 298 K) NMR spectrum of *N*-phenethyl-4-methyl-aniline.

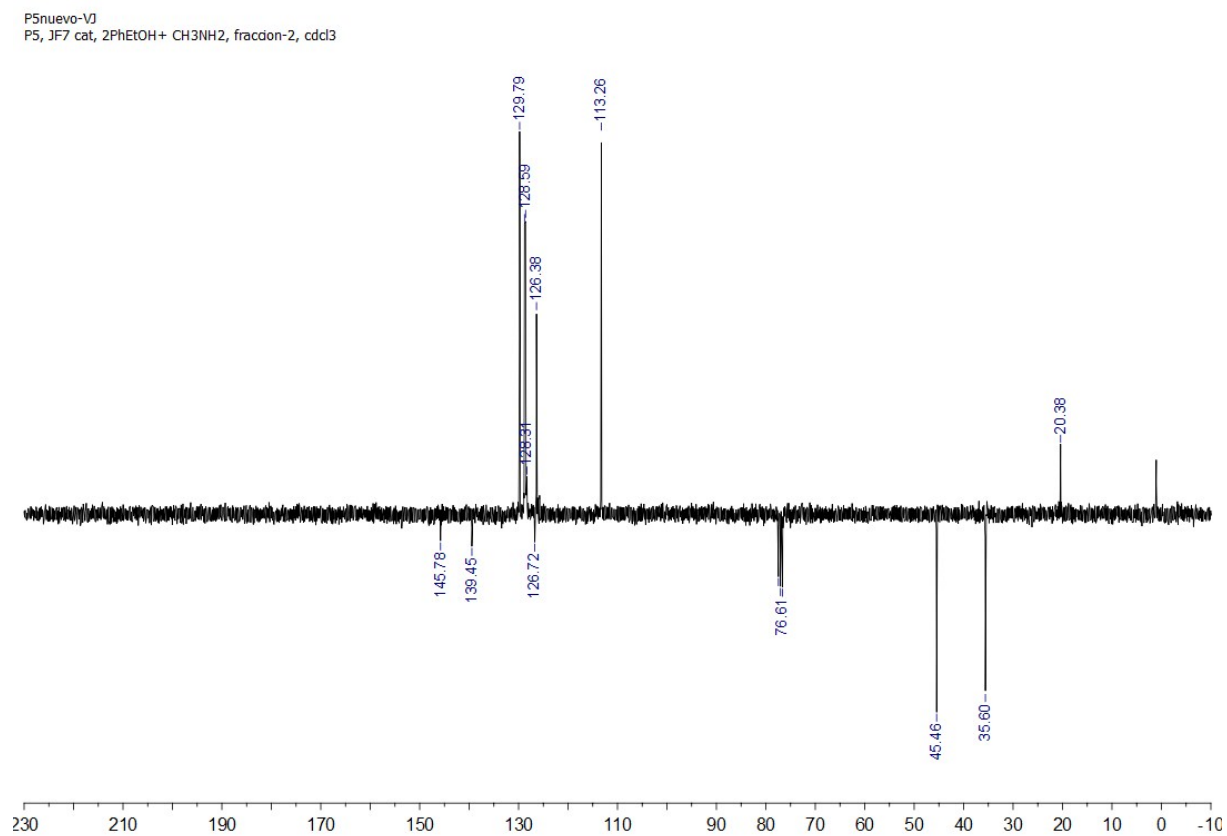

**Figure S14.**  $^{13}\text{C}\{^1\text{H}\}$ -apt ( $\text{CDCl}_3$ , 298 K) NMR spectrum of *N*-phenethyl-4-methyl-aniline.

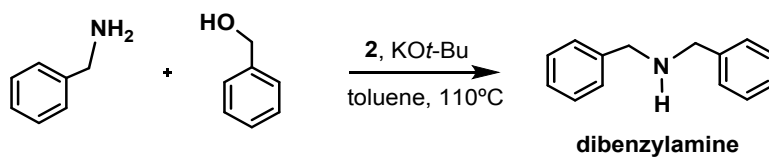

P-11  
fraccion 3 de la columna, hexano/eter(1:1)

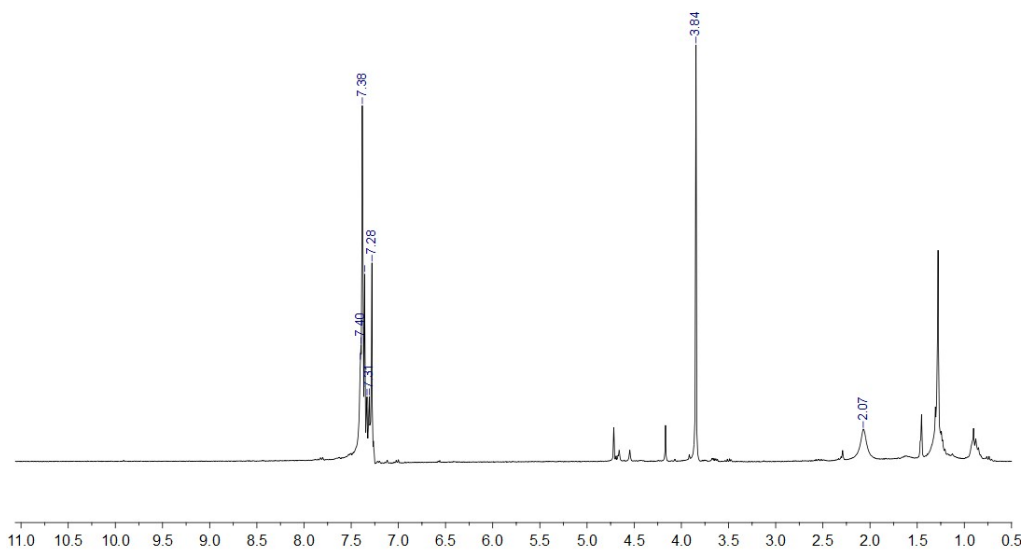

**Figure S15.**  $^1\text{H}$  ( $\text{CDCl}_3$ , 298 K) NMR spectrum of dibenzylamine.

P11-3  
 $\text{CDCl}_3$  19.09.17/eter/hexano, 1:1

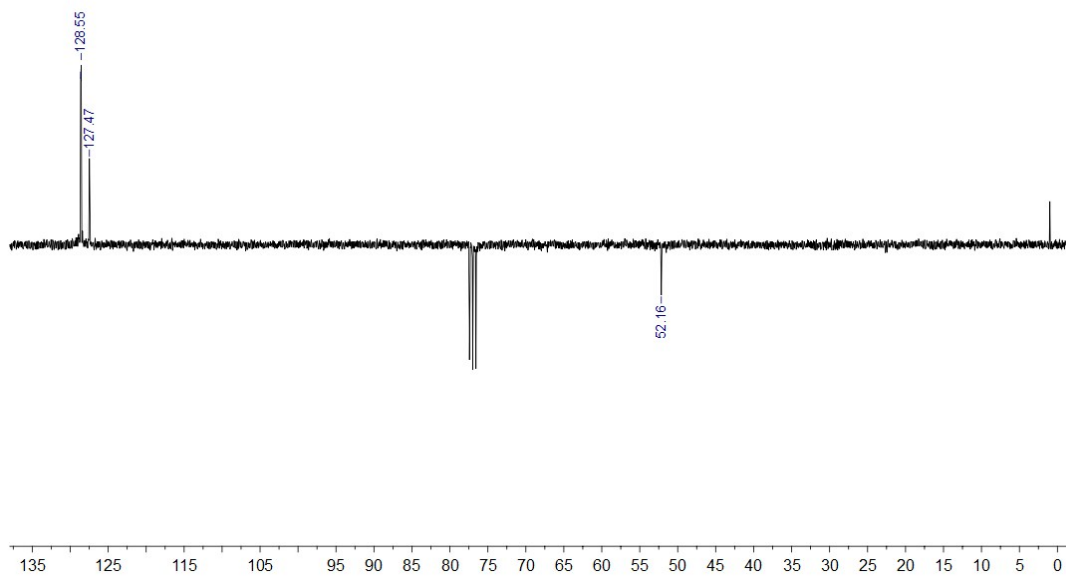

**Figure S16.**  $^{13}\text{C}\{^1\text{H}\}$ -apt ( $\text{CDCl}_3$ , 298 K) NMR spectrum of *N*-benzyl-2-phenylethan-1-amine.

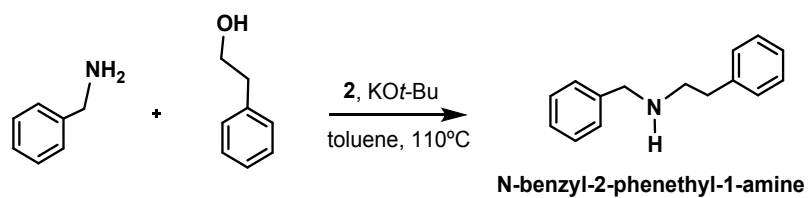

P12-VJ  
CDCl<sub>3</sub> 20.09.17/fradon-3, hexano/eter

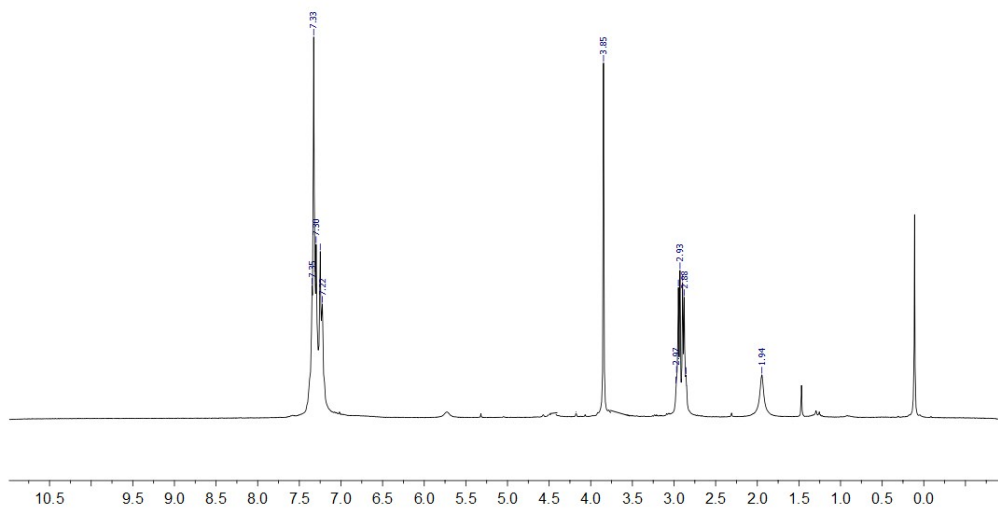

**Figure S17.** <sup>1</sup>H (CDCl<sub>3</sub>, 298 K) NMR spectrum of *N*-benzyl-2-phenylethan-1-amine.

P12-VJ  
CDCl<sub>3</sub> 20.09.17/fradon-3, hexano/eter, 13C-APT

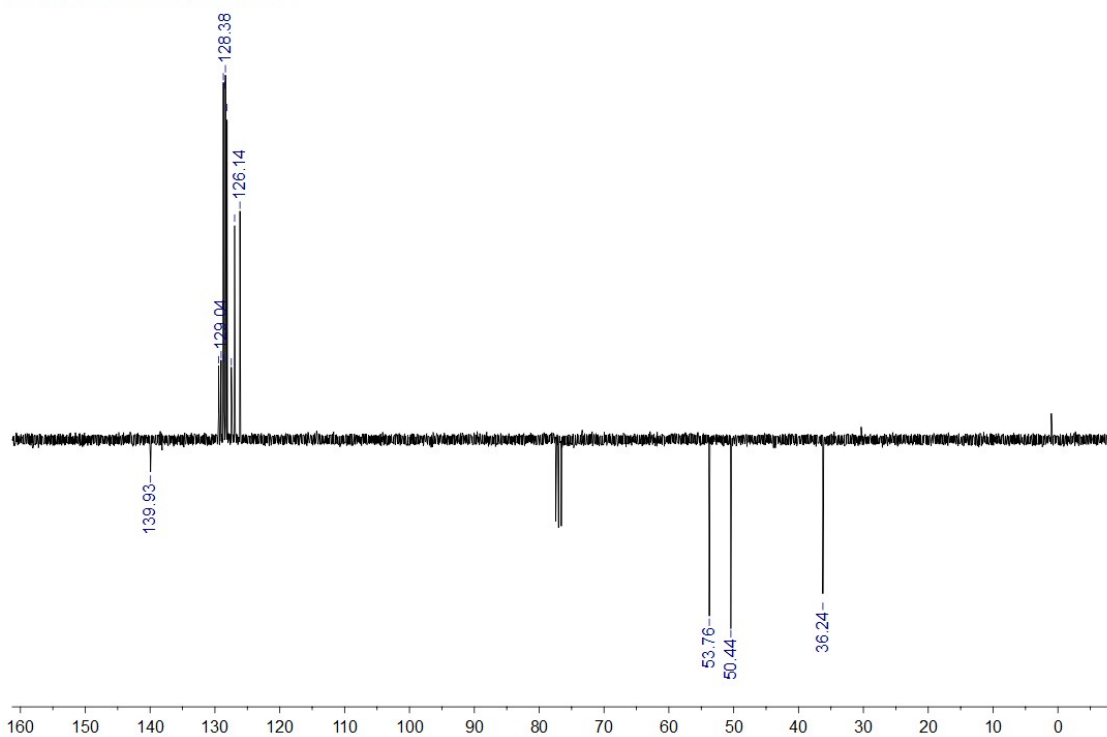

**Figure S18.** <sup>13</sup>C{<sup>1</sup>H}-apt (CDCl<sub>3</sub>, 298 K) NMR spectrum of *N*-benzyl-2-phenylethan-1-amine.

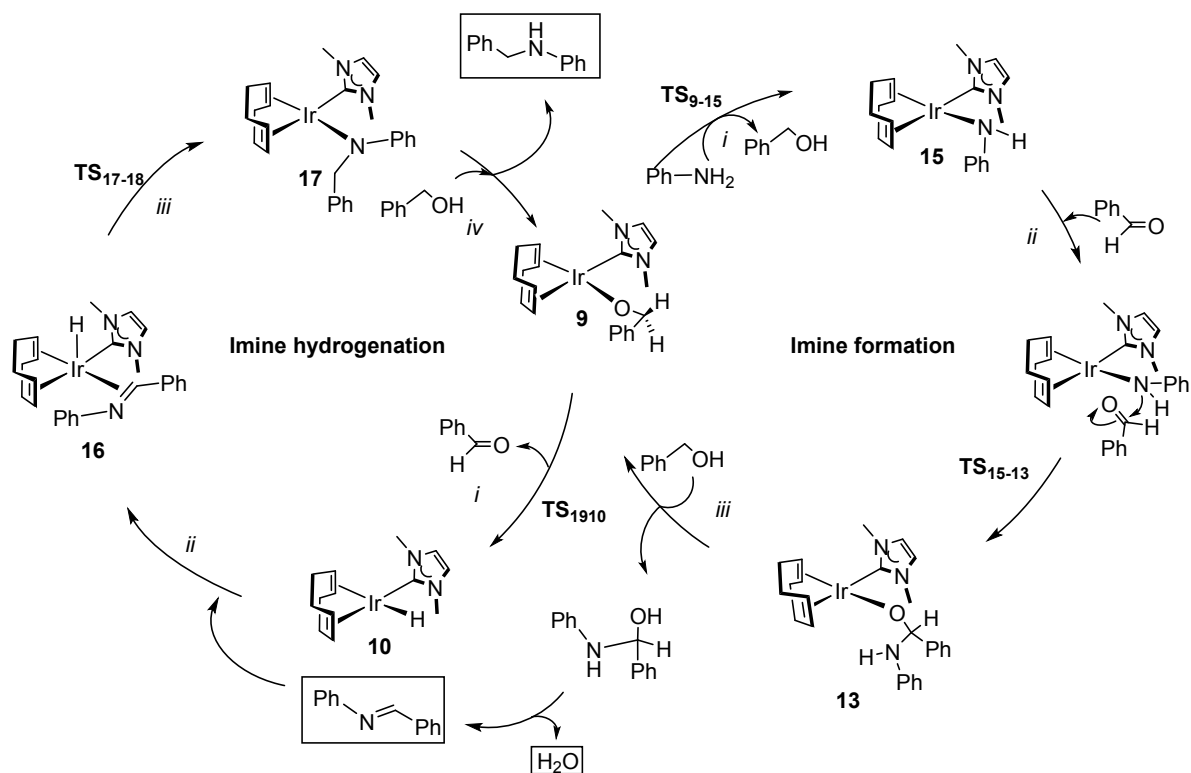

**Figure S19.** DFT calculated mechanism for the N-alkylation of amines with alcohols catalyzed by NHC-Ir(I) complexes.

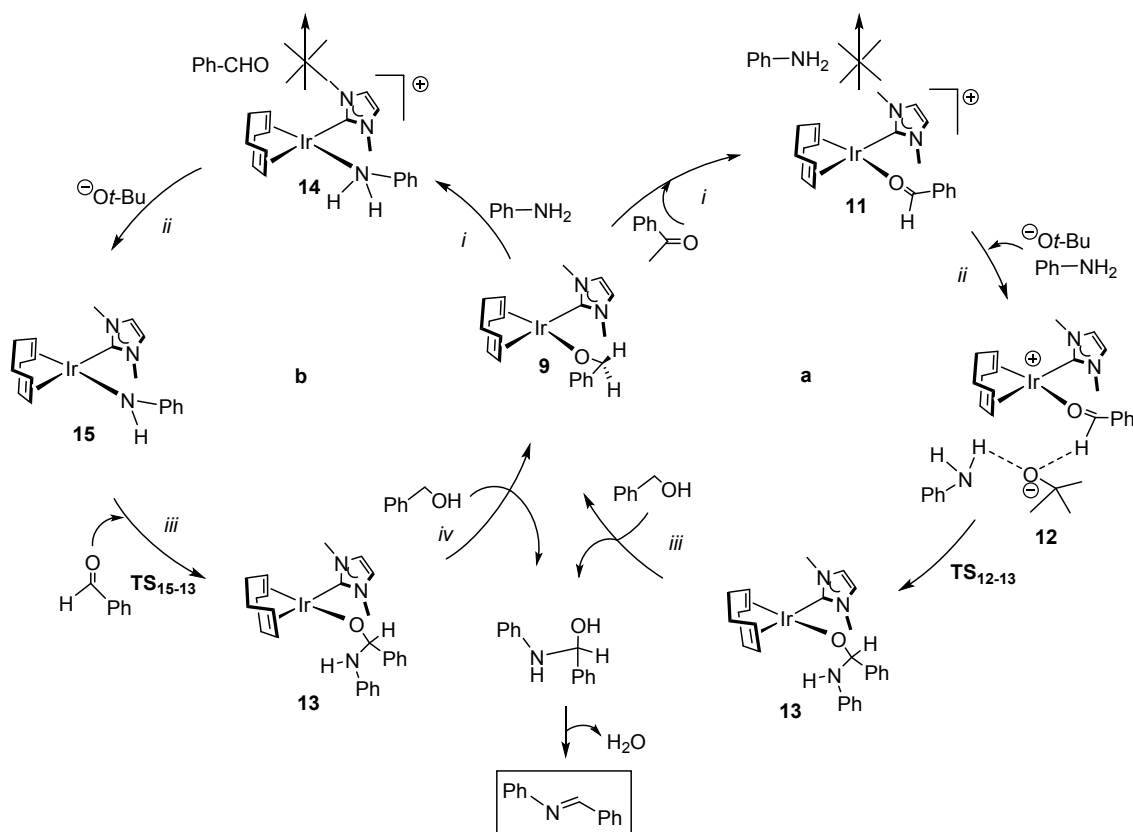

**Figure S20.** Alternative mechanisms for the imine formation catalyzed by NHC-Ir(I) complexes.



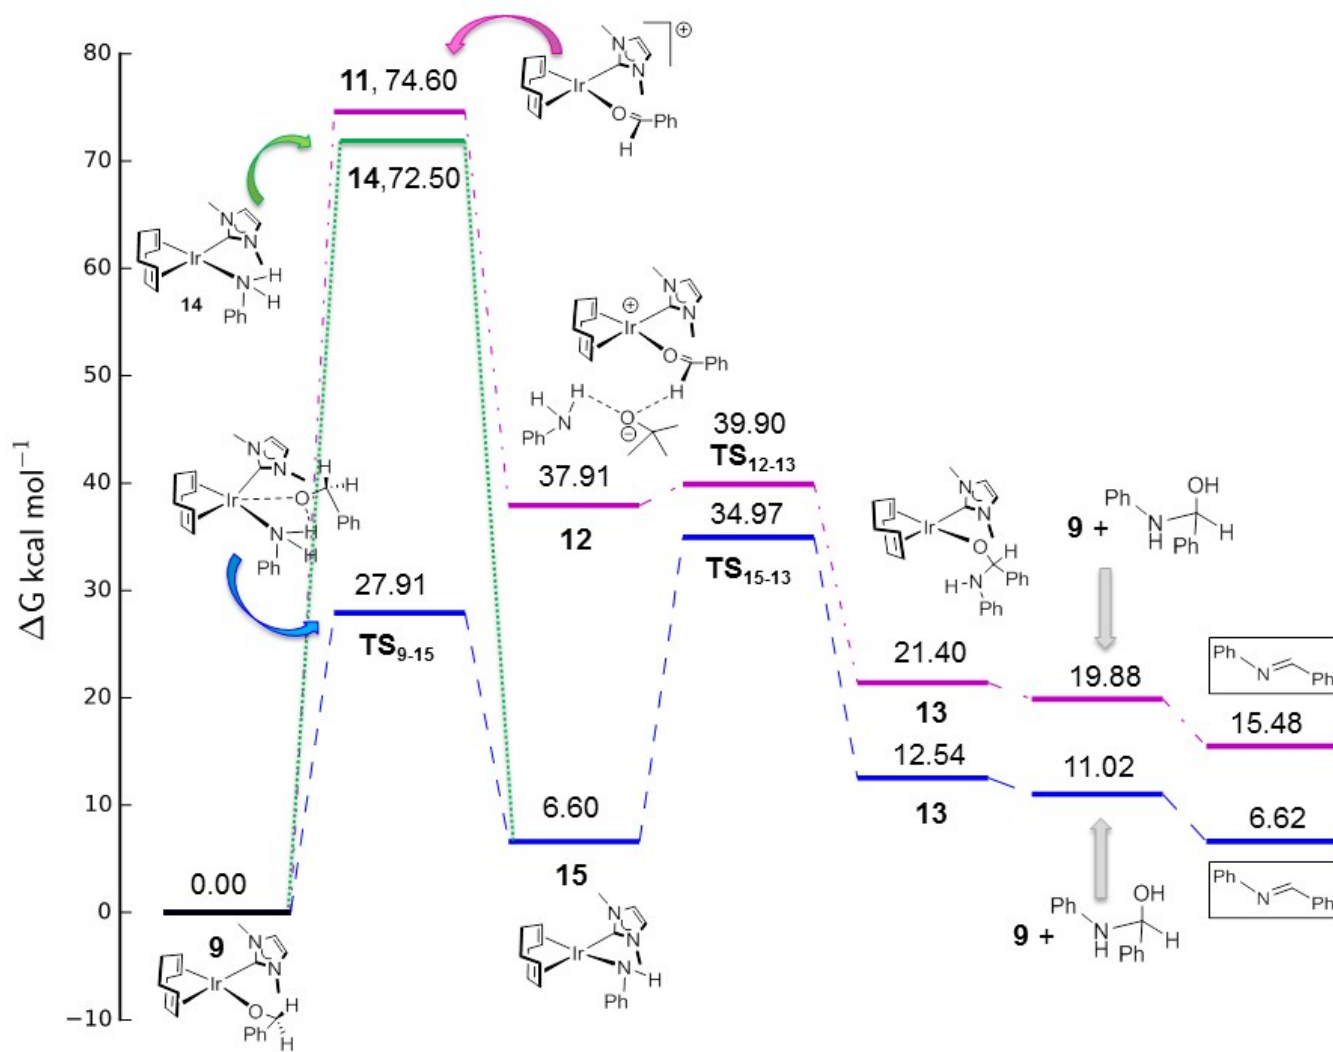

**Figure S21.** Energy profiles for the different pathways for the C-N bond formation step: operating mechanism (blue) and alternative mechanisms (a, pink; b, green).

**Table S1.** Calculated electronic and free energies.

| Compound                      | E(RB3PW91)<br>(Hartree) | G Sum of electronic and thermal<br>Free Energies (Hartree) |
|-------------------------------|-------------------------|------------------------------------------------------------|
| <b>9</b>                      | -1067.5643285           | -1067.184302                                               |
| <b>10</b>                     | -722.09388046           | -721.818141                                                |
| <b>11</b>                     | -1066.8088521           | -1066.436824                                               |
| <b>12</b>                     | -1587.4299554           | -1586.839588                                               |
| <b>13</b>                     | -1353.8679317           | -1353.398354                                               |
| <b>14</b>                     | -1008.8770614           | -1008.492860                                               |
| <b>15</b>                     | -1008.4130112           | -1008.043124                                               |
| <b>16</b>                     | -1278.6433980           | -1278.172750                                               |
| <b>17</b>                     | -1278.6593847           | -1278.188988                                               |
| <b>TS<sub>9-10</sub></b>      | -1067.5230436           | -1067.143605                                               |
| <b>TS<sub>9-15</sub></b>      | -1355.0505187           | -1354.557215                                               |
| <b>TS<sub>15-13</sub></b>     | -1353.83565346          | -1353.362602                                               |
| <b>TS<sub>16-17</sub></b>     | -1278.6181018           | -1278.150856                                               |
| <b>TS<sub>12-13</sub></b>     | -1587.4264847           | -1586.835106                                               |
| <b>aniline</b>                | -287.50590162           | -287.417389                                                |
| <b>benzyl alcohol</b>         | -346.649328393          | -346.548078                                                |
| <b>benzoxide</b>              | -346.080620761          | -345.993293                                                |
| <b>ter-butoxide</b>           | -233.017394274          | -232.925931                                                |
| <b>tert-butanol</b>           | -233.602548874          | -233.495488                                                |
| <b>hemiaminal</b>             | -632.955476543          | -632.764551                                                |
| <b>imine</b>                  | -556.546392319          | -556.380921                                                |
| <b>amine prod.</b>            | -557.764948546          | -557.576810                                                |
| <b>benzaldehyde</b>           | -345.444428714          | -345.364698                                                |
| <b>water</b>                  | -76.3946102517          | -76.390699                                                 |
| <b>S-9</b>                    | -1413.00800630          | -1412.521315                                               |
| <b>S-15</b>                   | -1353.85981349          | -1353.385238                                               |
| <b>S-TS<sub>15-13-a</sub></b> | -1699.28170613          | -1698.705060                                               |
| <b>S-TS<sub>15-13-b</sub></b> | -1699.27886162          | -1698.701042                                               |
| <b>S-TS<sub>16-17</sub></b>   | -1624.06351980          | -1623.491183                                               |

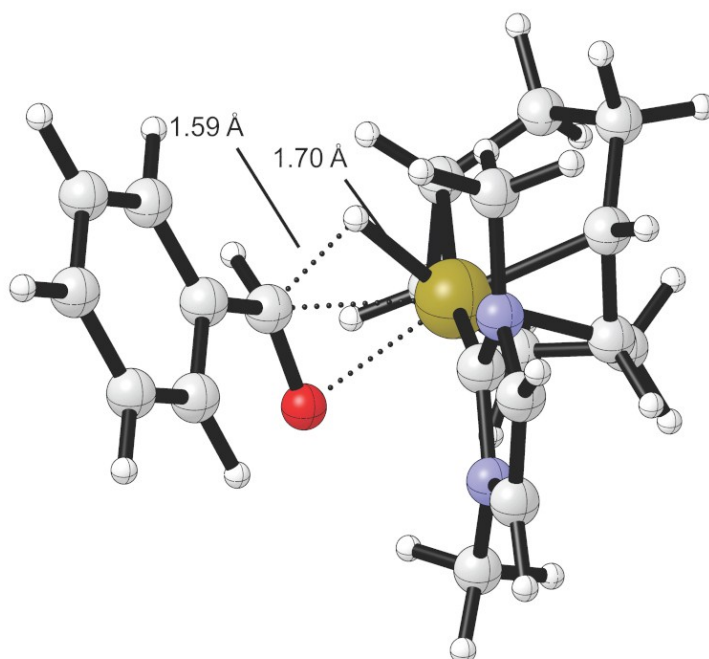

**Figure S22.** Transition structure  $TS_{9-10}$  for the formation of benzaldehyde by  $\beta$ -H elimination from a benzoxide ligand.

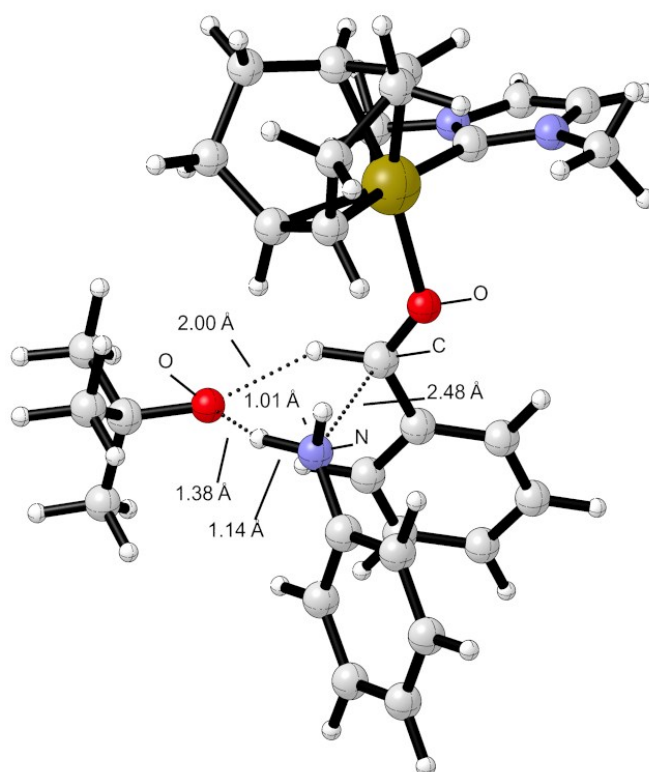

**Figure S23.** Transition structure  $TS_{12-13}$  for the nucleophilic attack of aniline on a coordinated benzaldehyde ligand.

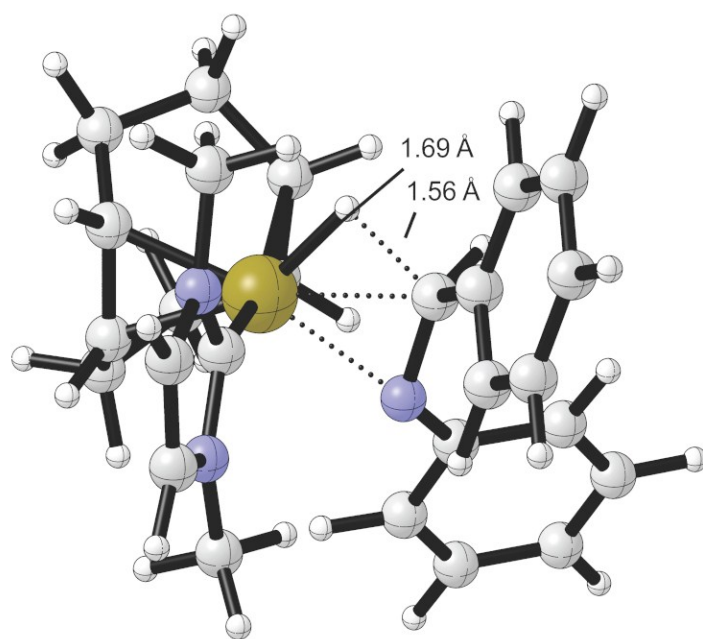

**Figure S24.** Transition structure  $\text{TS}_{16-17}$  for the insertion of imine into the Ir-H bond leading to hydrogenation.
